# Supplementary material
Source: Springer Nature journal article supplement (https://www.springermedizin.de/resource/supplementary/12899_2010_171_MOESM4_ESM.pdf/9514634)

# unsuccessful

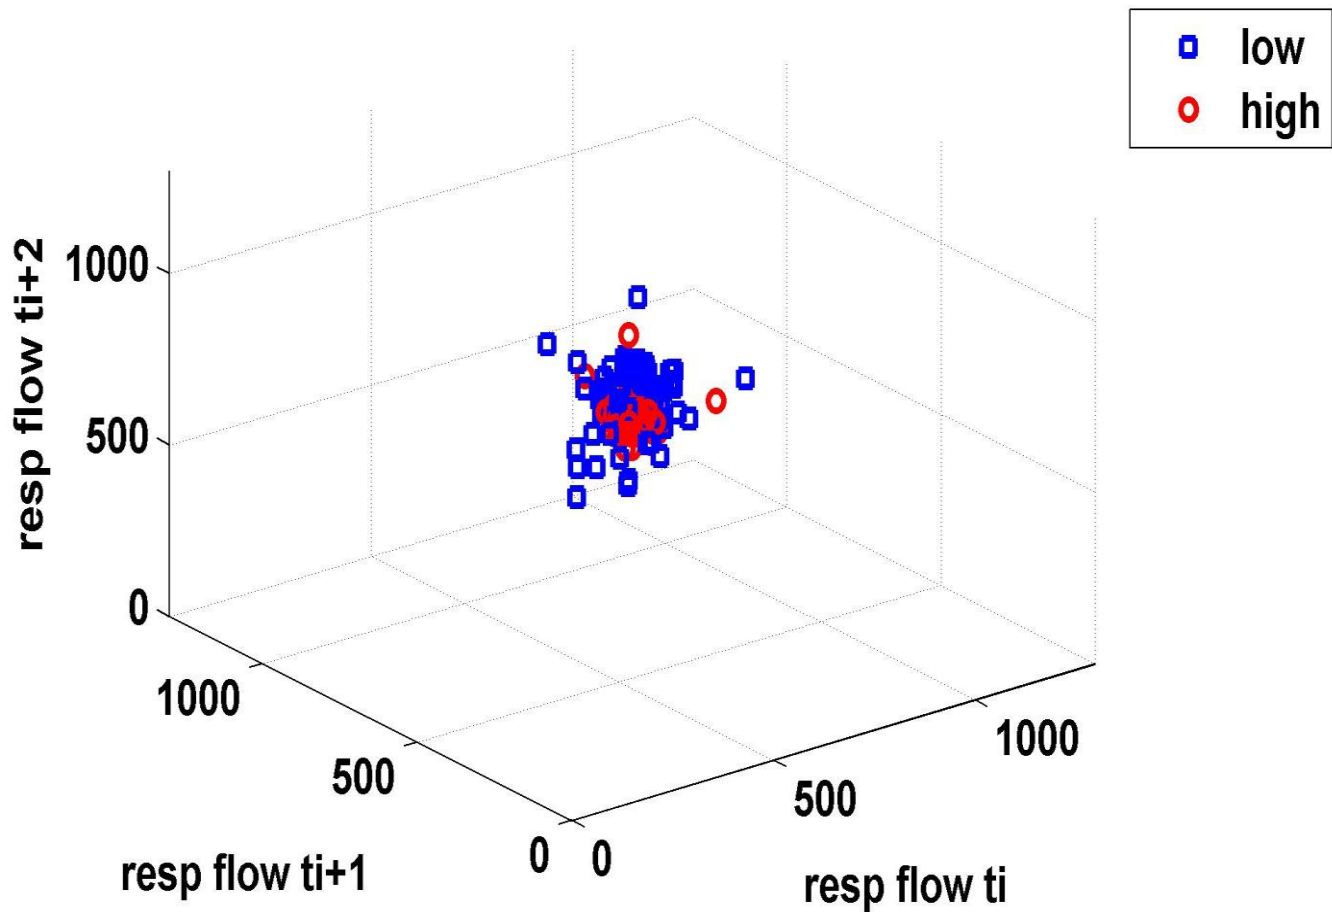

Supplement: MOESM4 [file 9514634]
